# Supplementary material for: PD-L1 expression in recurrent or metastatic head and neck squamous cell carcinoma in China (EXCEED study): a multicentre retrospective study
Source: HighWire-hosted journal article supplement (doi:10.1136/jcp-2023-209059), 2023-11-15
Supplement: jcp-2023-209059supp001_data_supplement.pdf [file jcp-2023-209059supp001_data_supplement.pdf]

Proprietary

---

**Appendix 1.** List of involved hospitals and research institutes.

- National Cancer Center/National Clinical Research Center for Cancer/Cancer Hospital, Chinese Academy of Medical Sciences and Peking Union Medical College, Beijing, China
- Tongji Hospital, Tongji Medical College, Huazhong University of Science & Technology, Wuhan, China
- West China Hospital, Sichuan University, Chengdu, China
- Sun Yat-Sen University Cancer Center, Guangzhou, China
- Henan Cancer Hospital, Zhengzhou, China
- Fudan University Shanghai Cancer Center, Shanghai, China
